# Supplementary material
Source: ML conference proceedings conference paper supplement (https://openreview.net/forum?id=XVHXVdoV11)
Supplement: supplementary_material [file attachment]

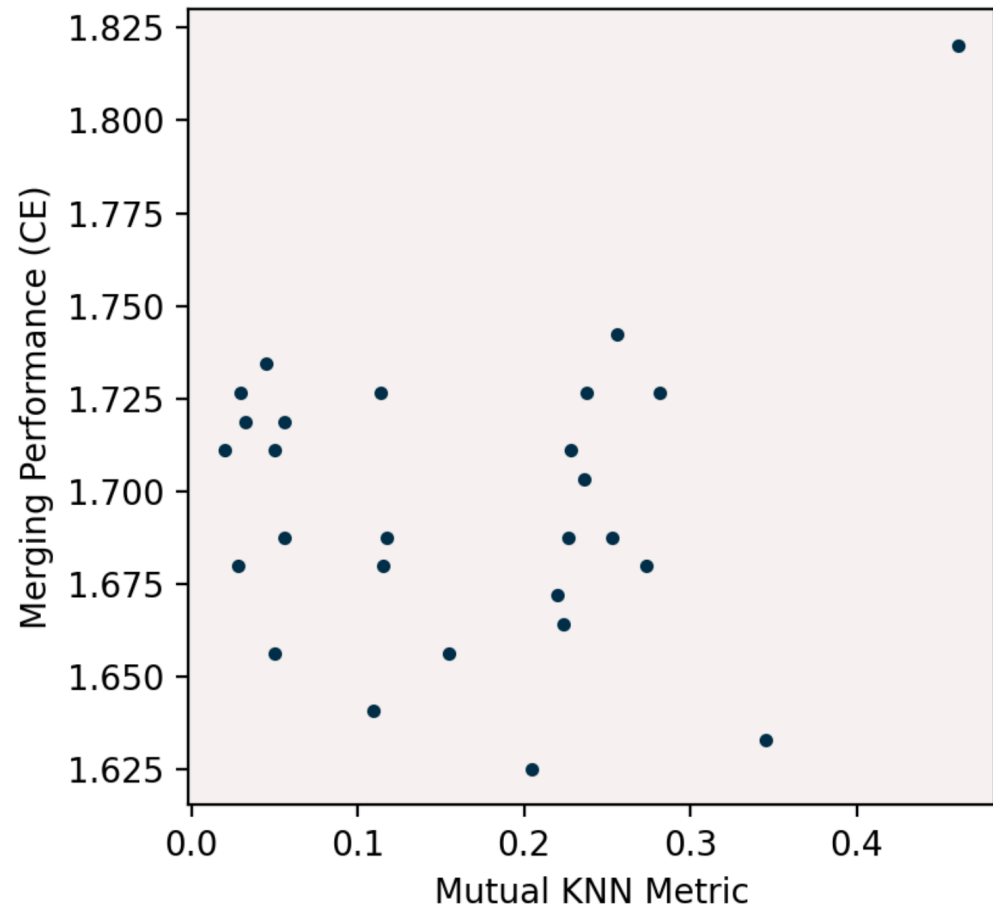

We reran the merging performance vs the representation similarity metric using mutual-knn as our metric. Each dot represents a different time step in the finetuning process, where we use activation interpolation to merge the models. The same “U” shape curve appears.

# Test Loss vs. Number of Router Layers

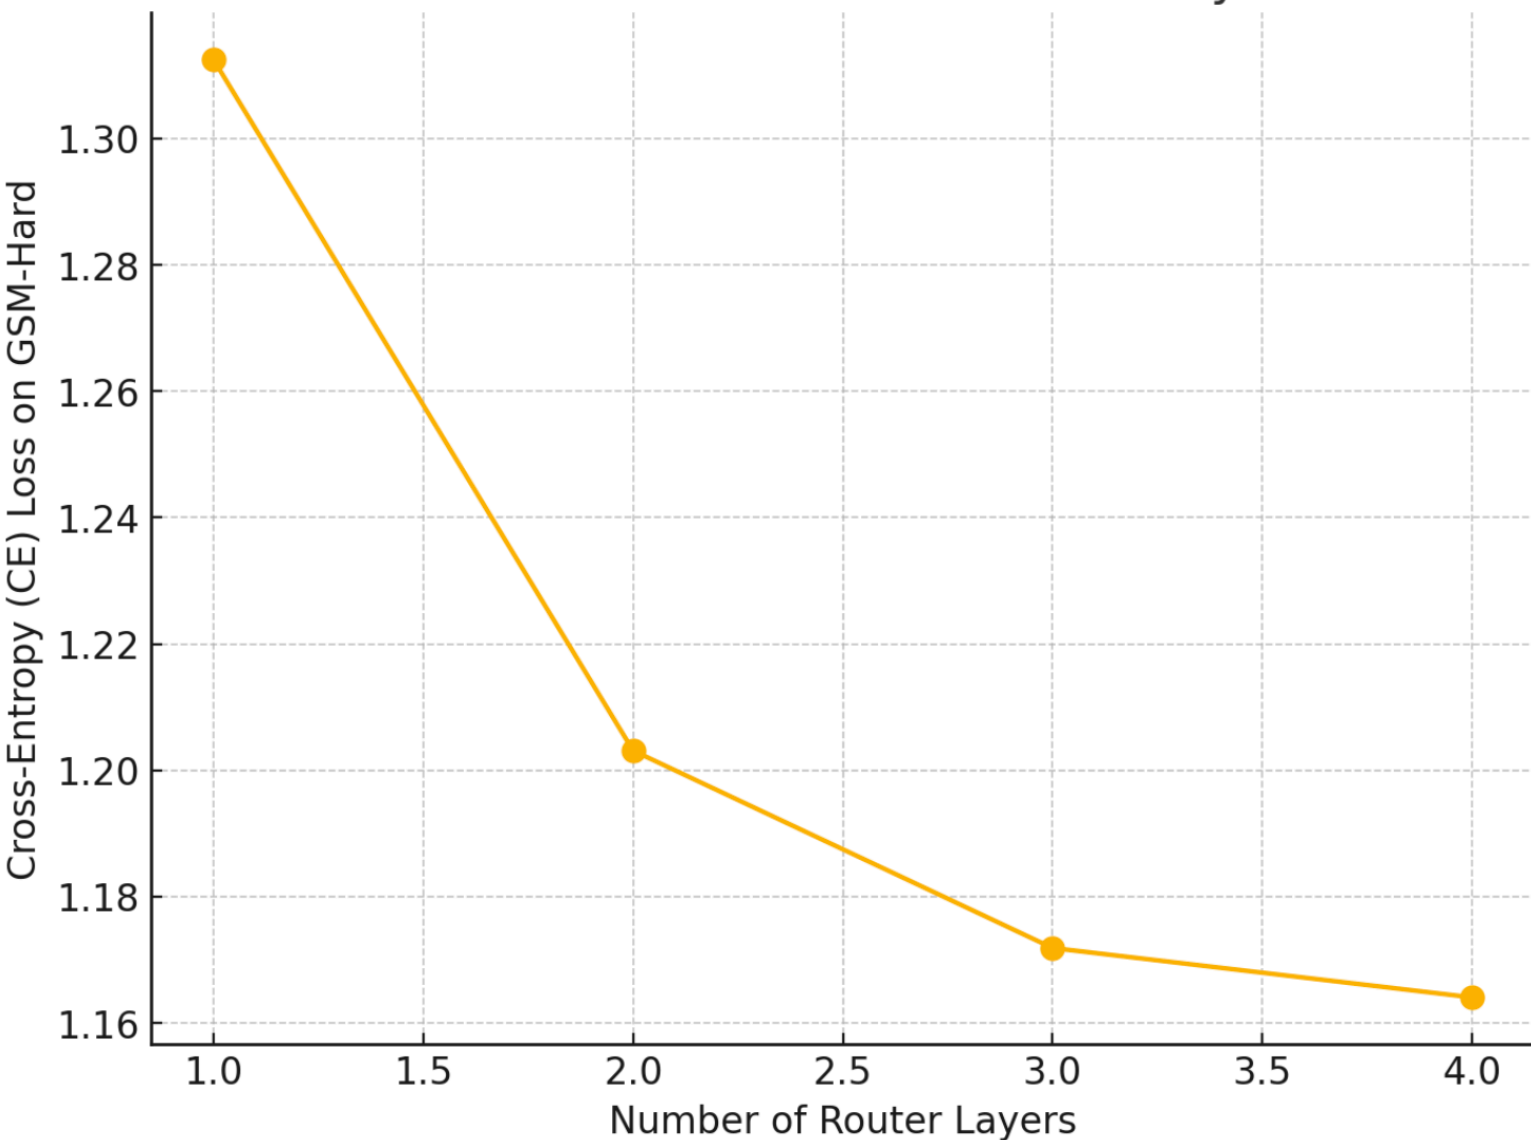

We extended the cross domain (math and coding) to 4 layers as well. The same trend holds where gains are smaller at each increment.
